# Supplementary material for: A genetic map of cassava (Manihot esculenta Crantz) with integrated physical mapping of immunity-related genes
Source: PubMed Central journal article supplement (PMC4417308; doi:10.1186/s12864-015-1397-4), 2015-03-16

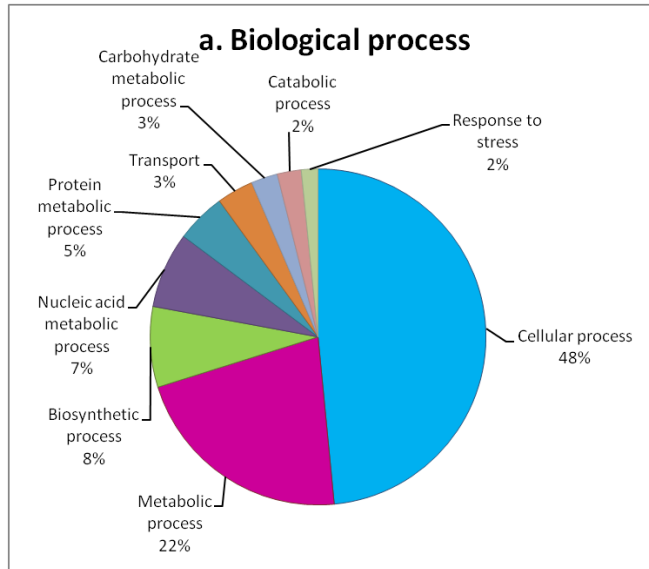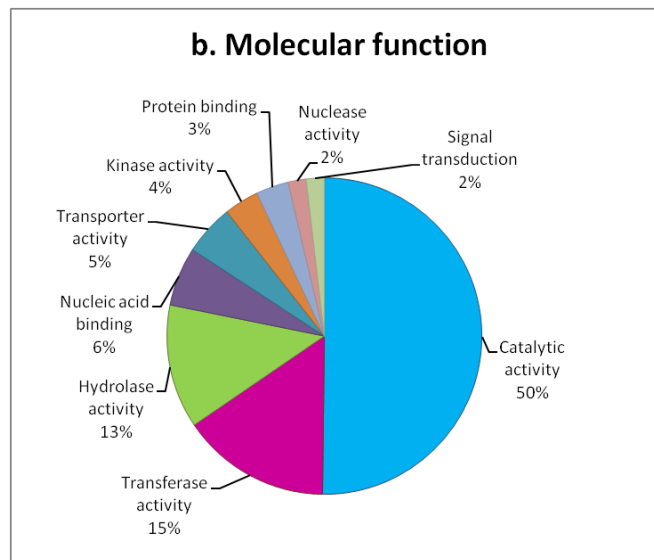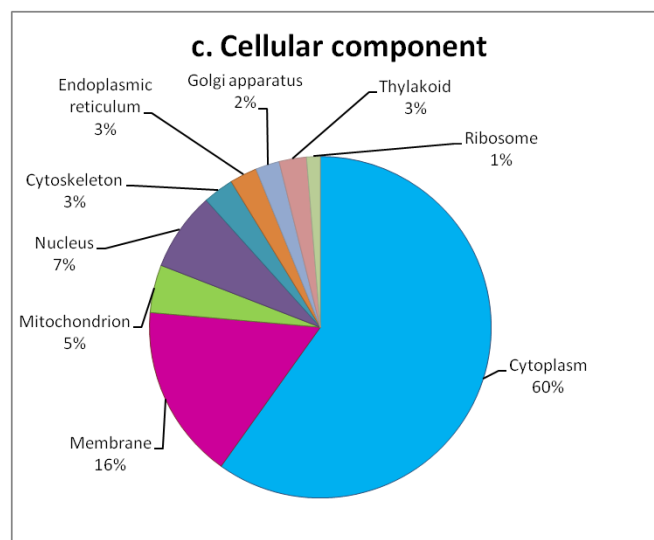

Supplement: 12864_2015_1397_MOESM3_ESM.pdf [file 12864_2015_1397_MOESM3_ESM.pdf]
